# Supplementary material
Source: Elsevier journal article supplement (https://comptes-rendus.academie-sciences.fr/biologies/article/10.1016/j.crvi.2014.12.003/file/attach/mmc5.pdf)

# Appendix E. Bayesian trees of the 12 independent markers

## Cytochrome b

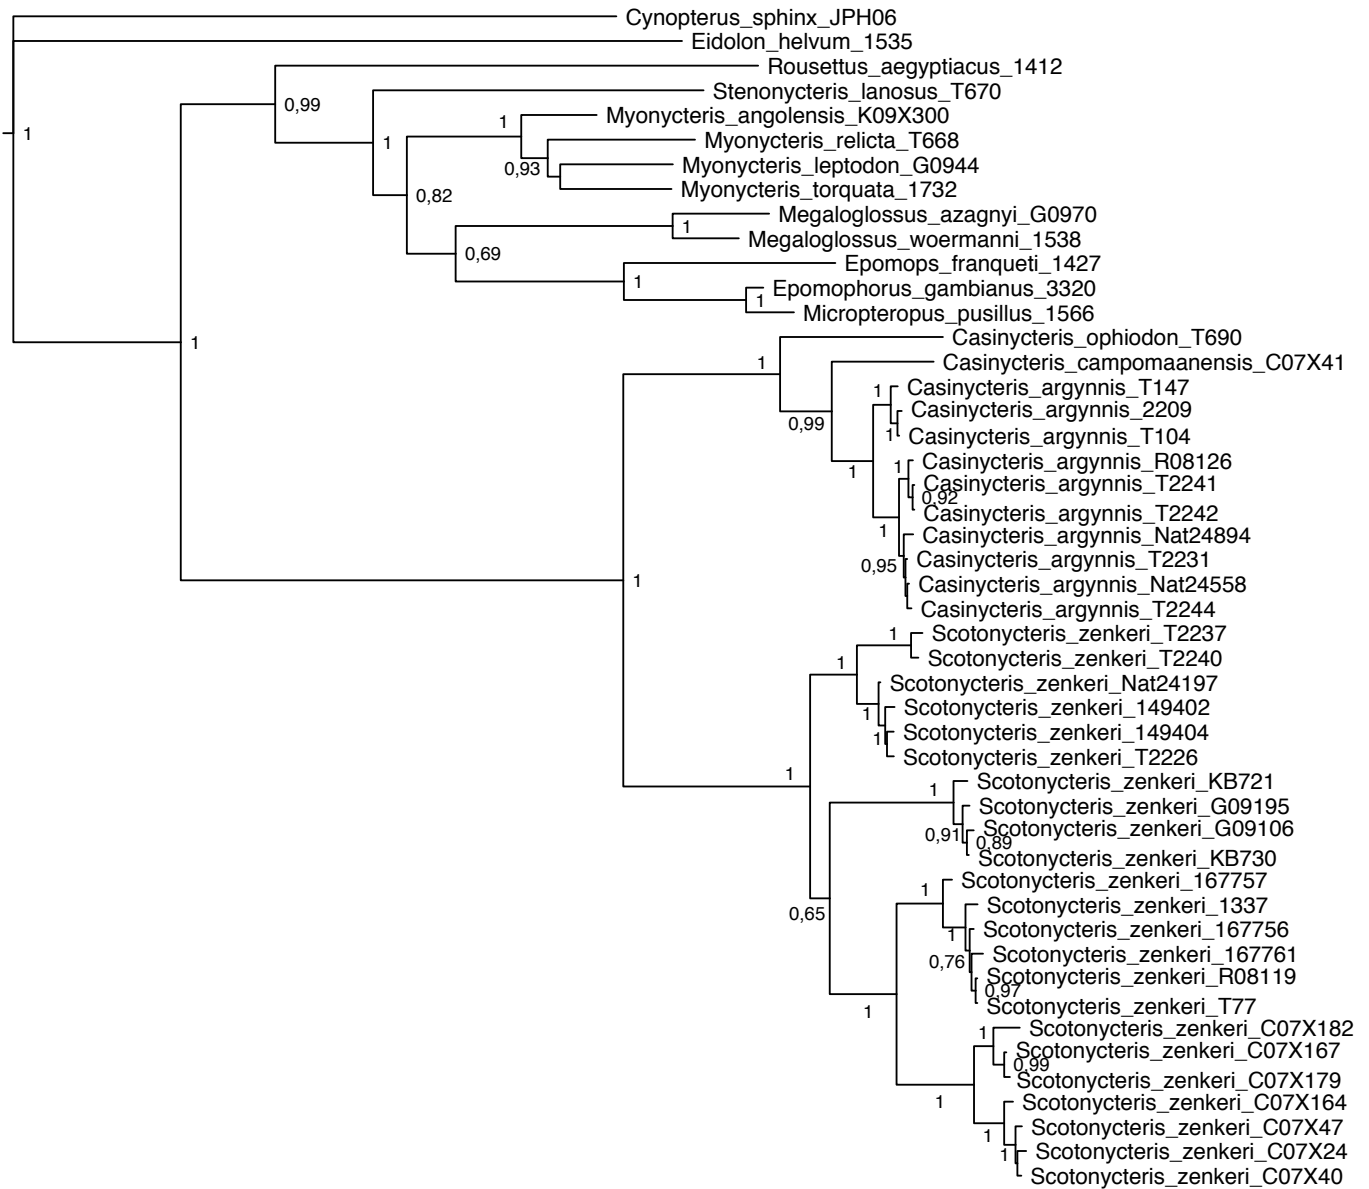

# CCAR1

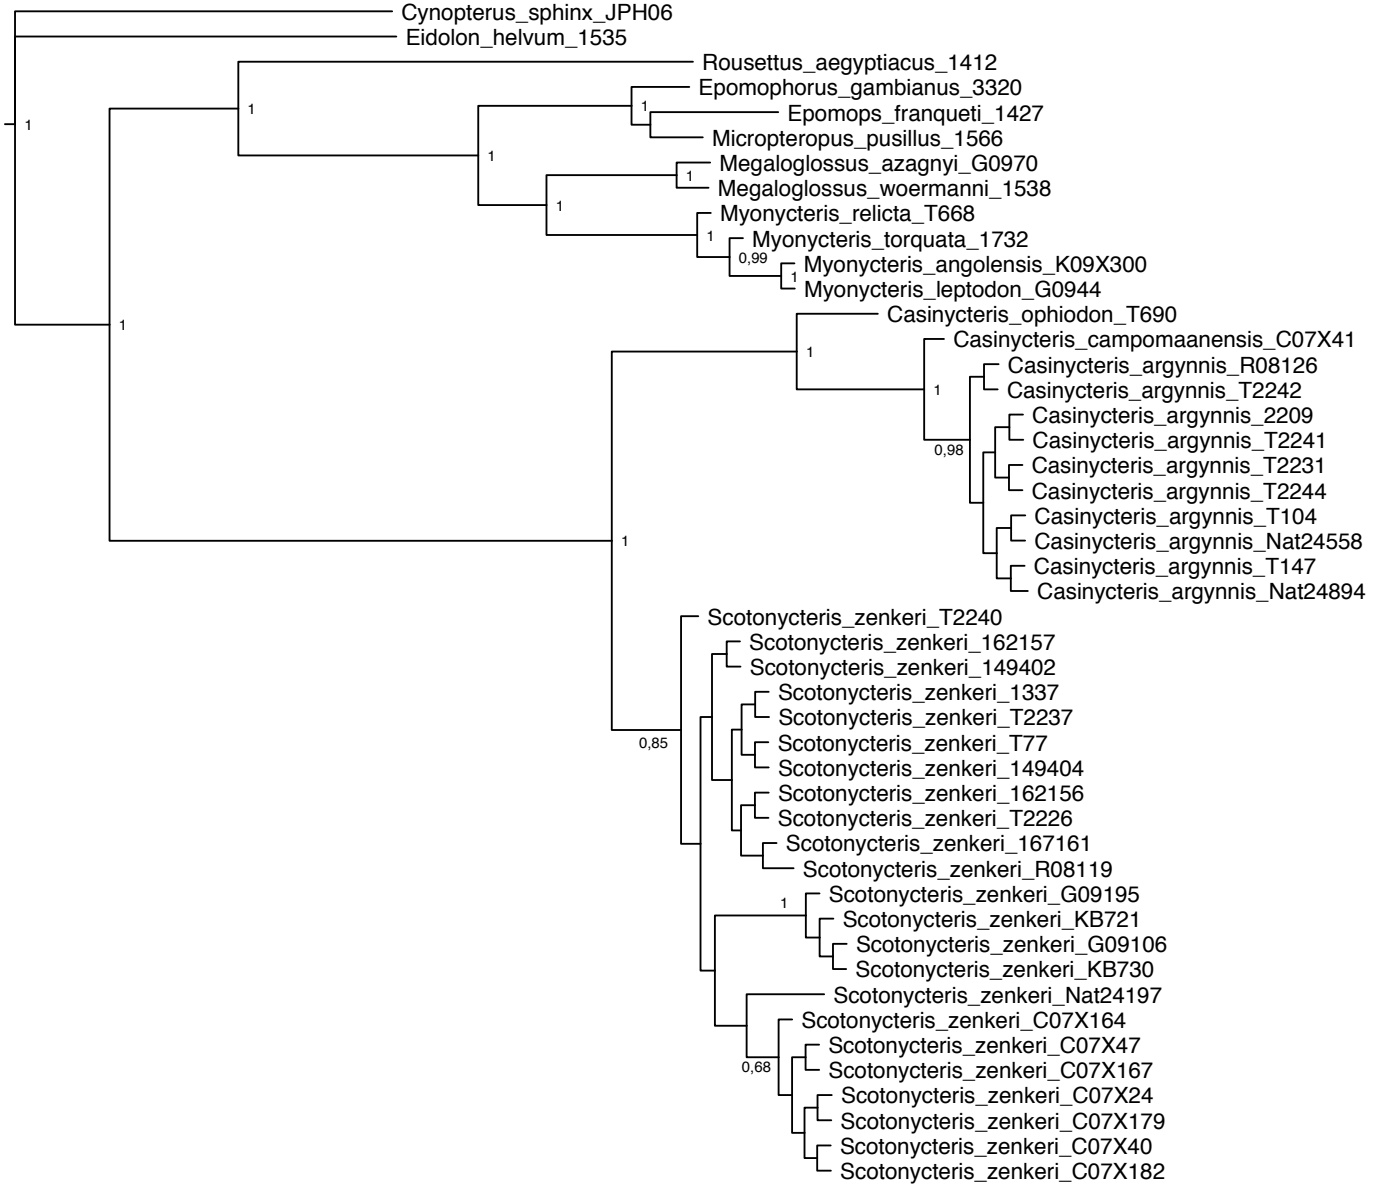

# DHX29

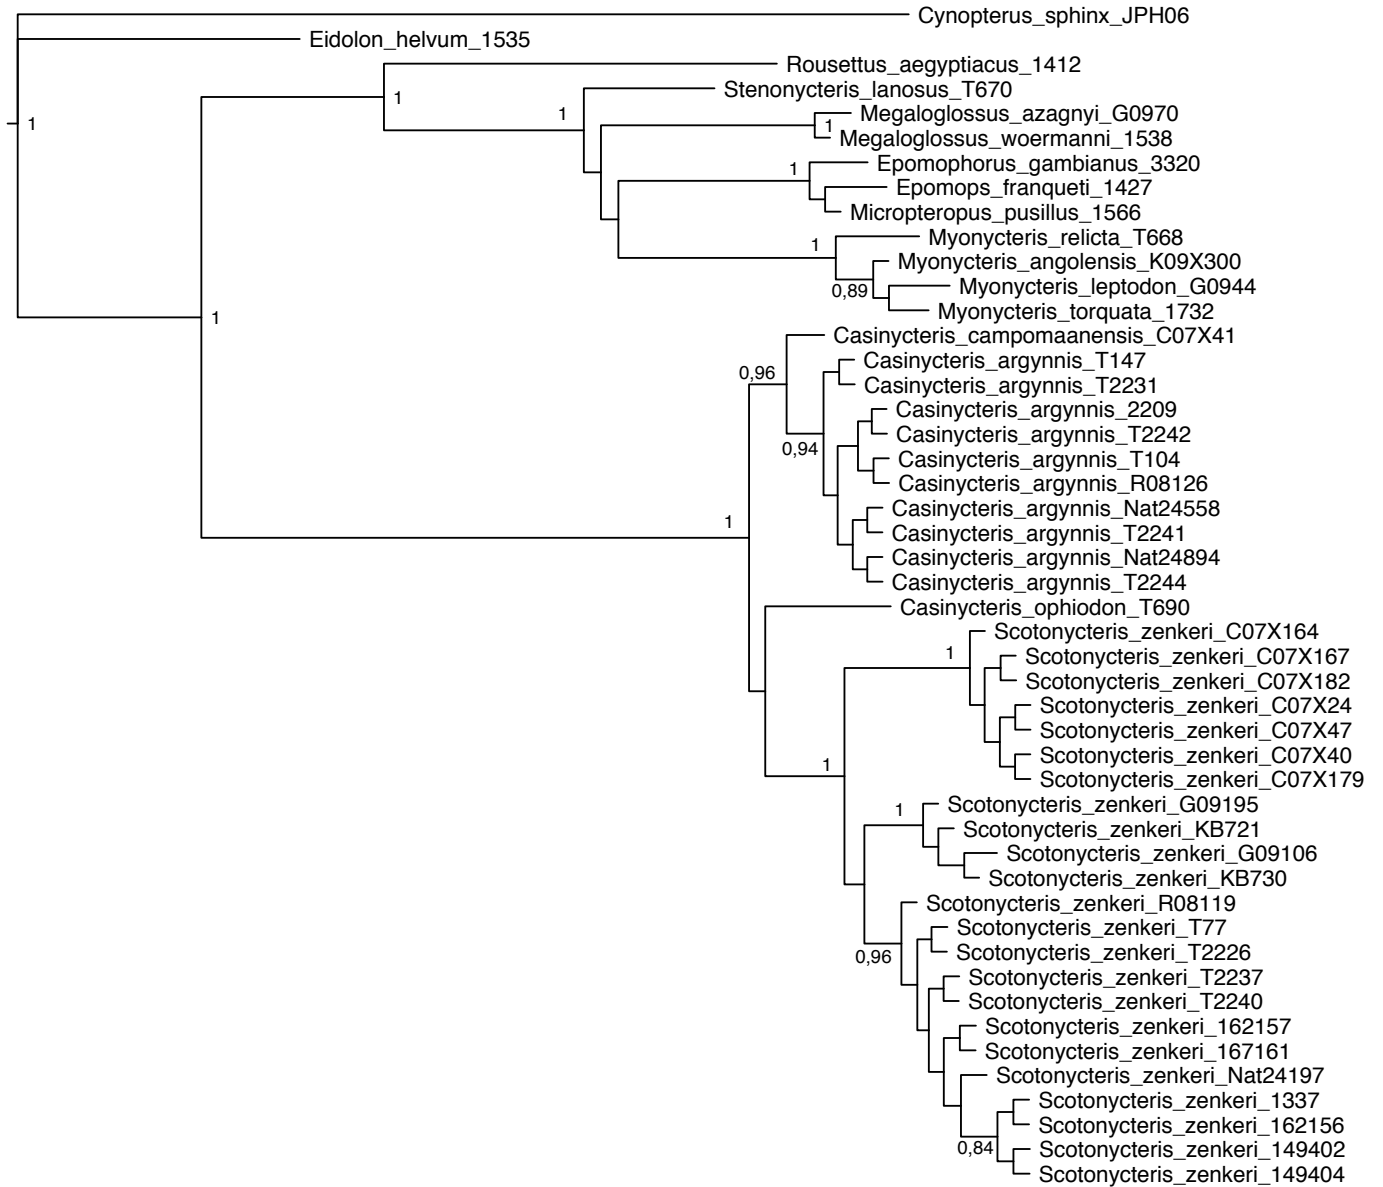

# DIS3

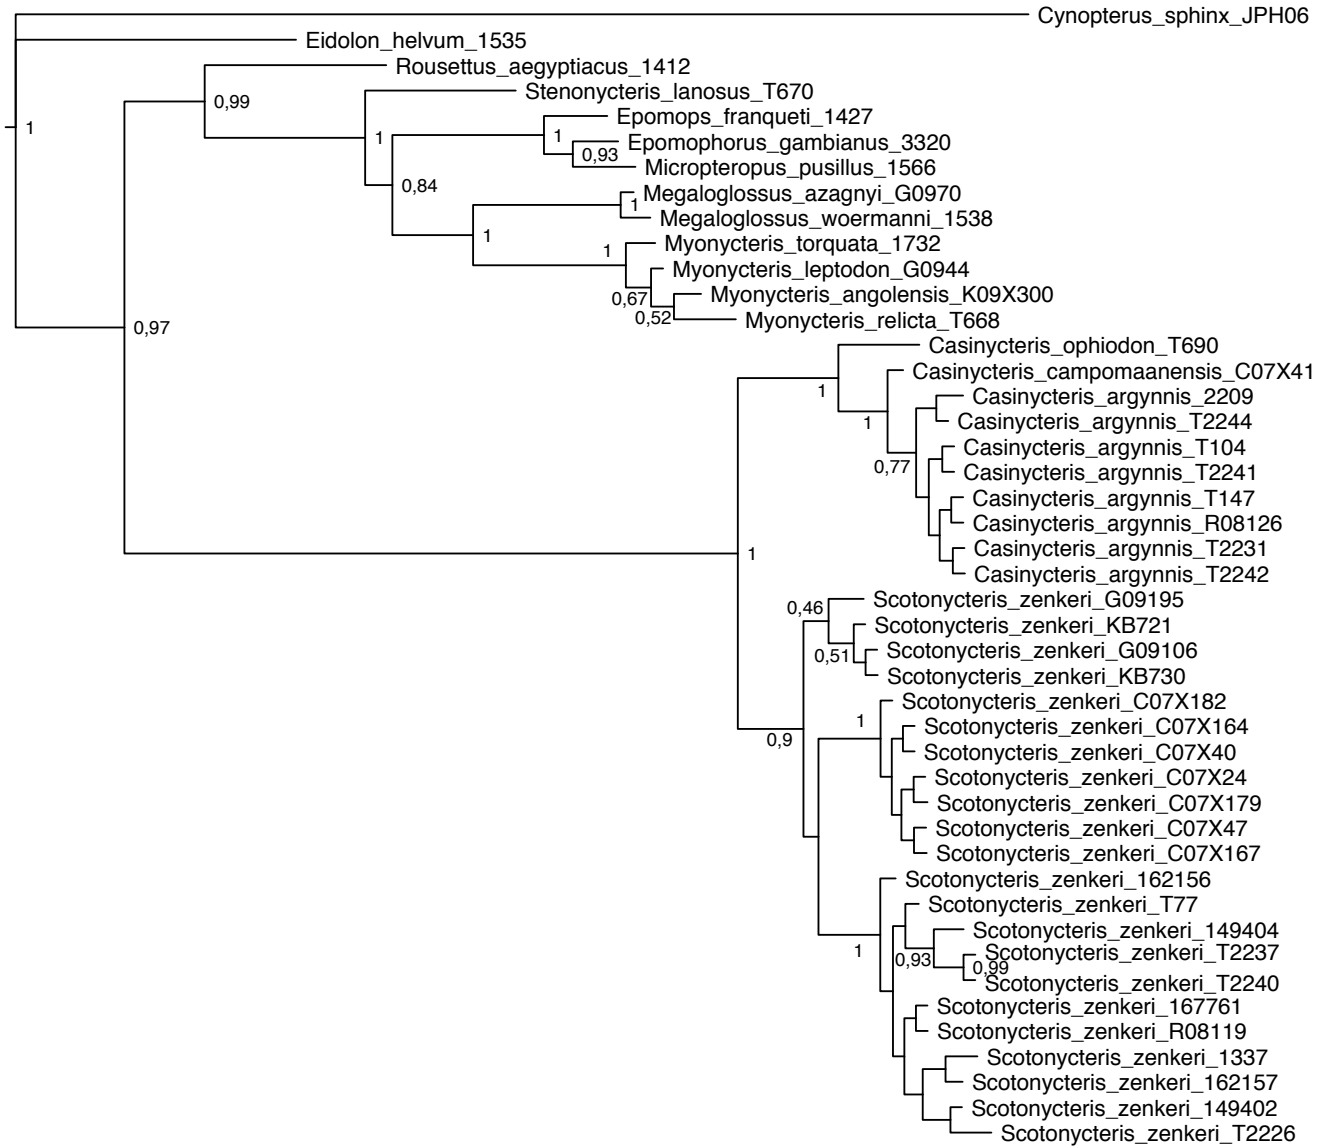

# EXOSC9

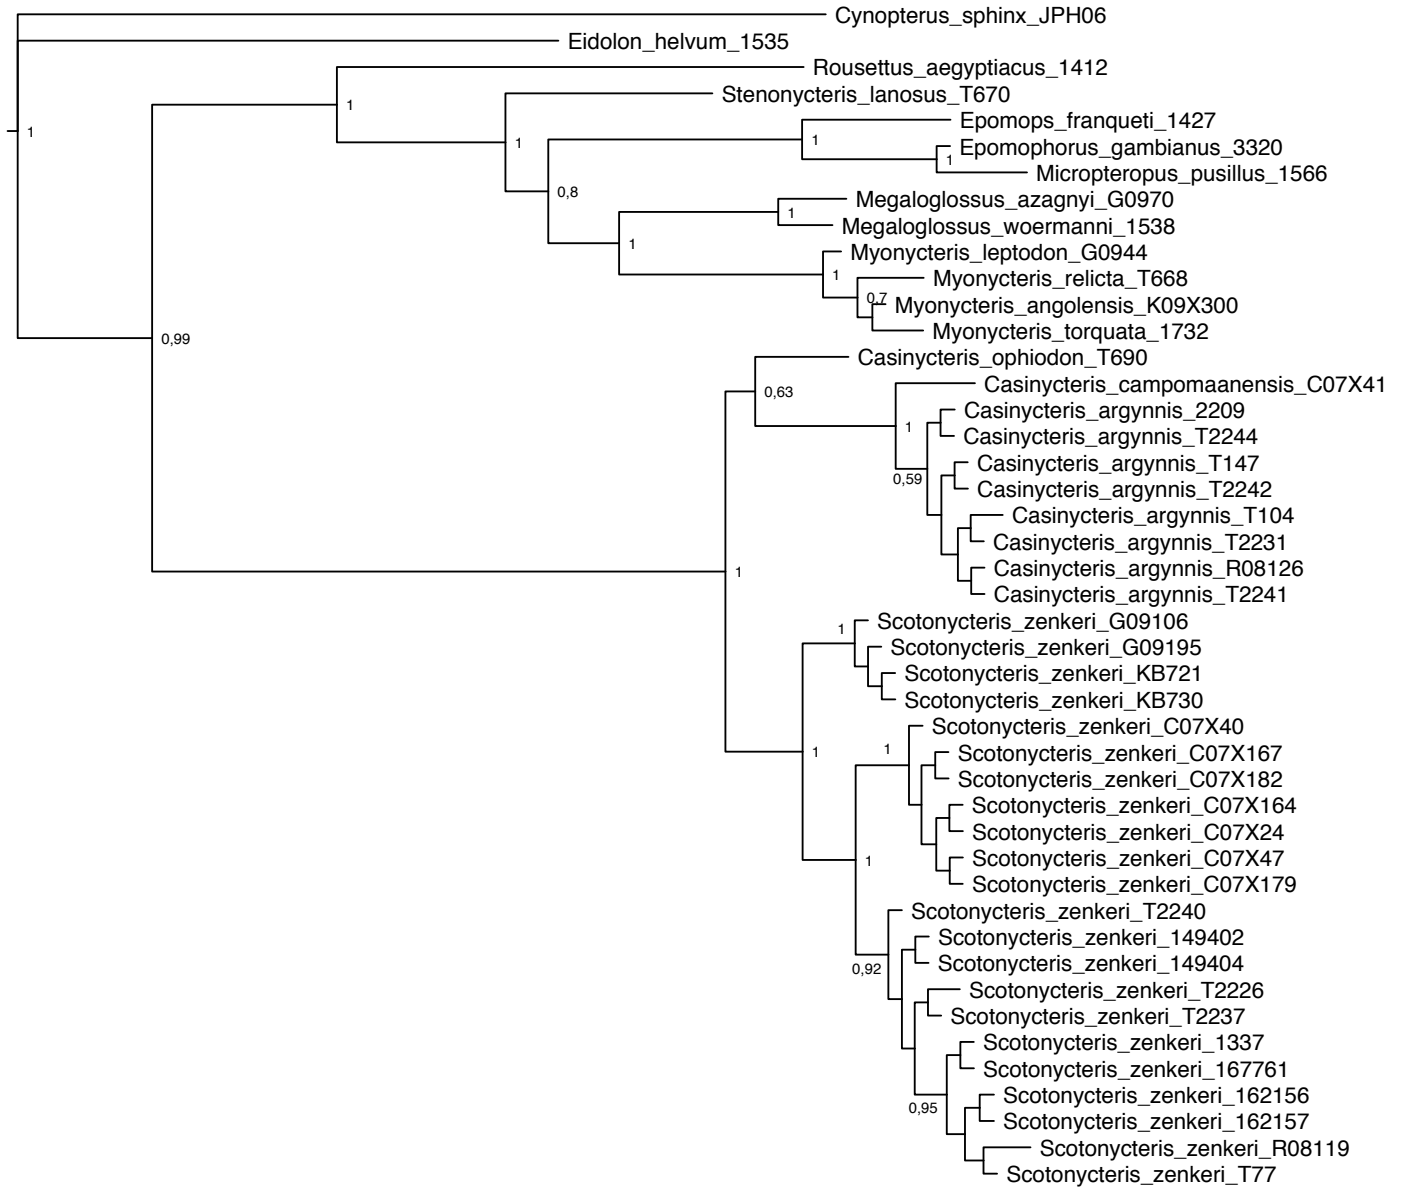

# FGB

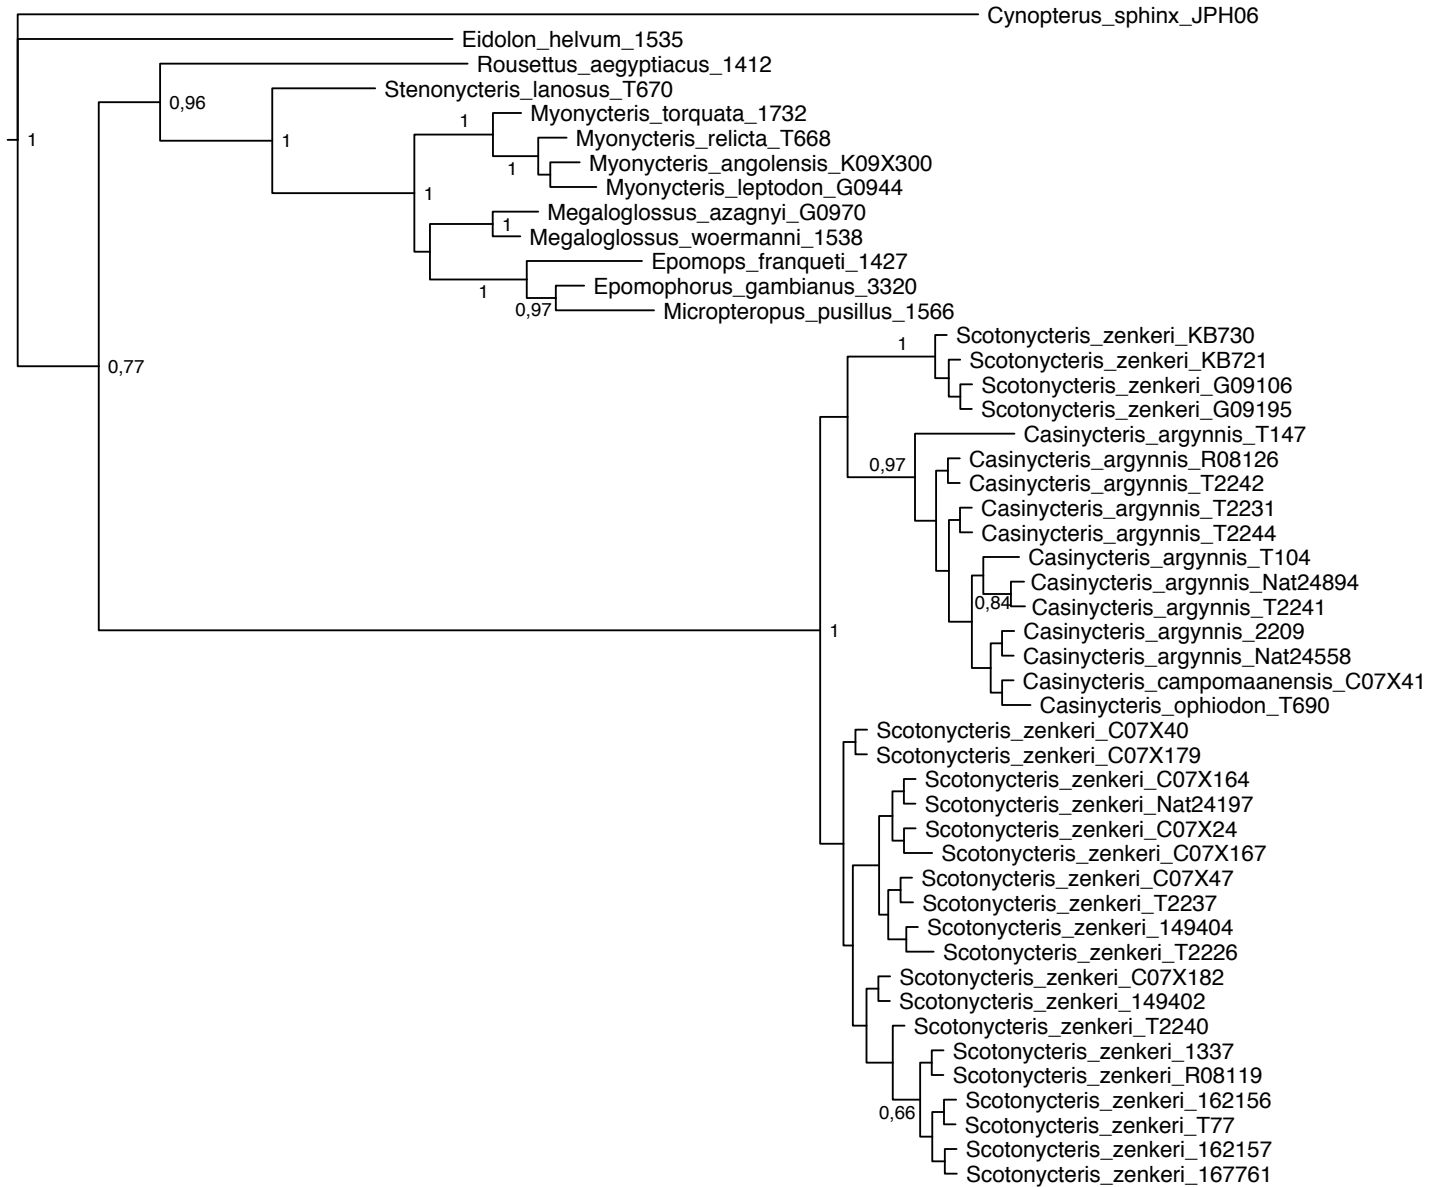

# HDAC1

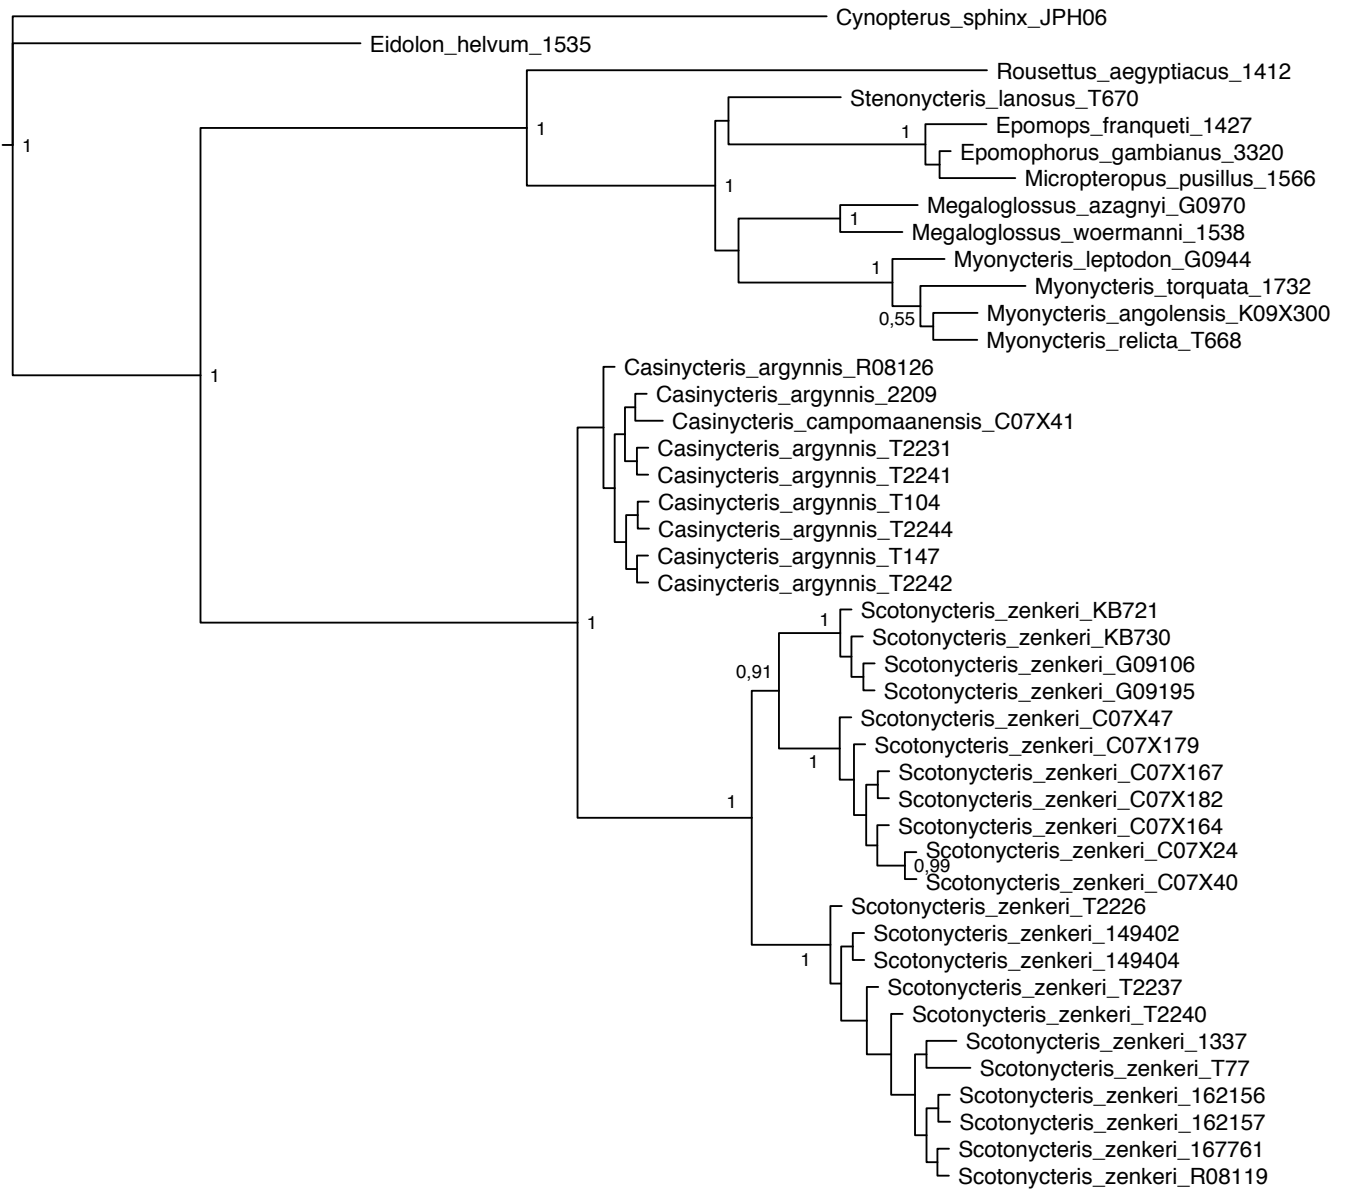

# HDAC2

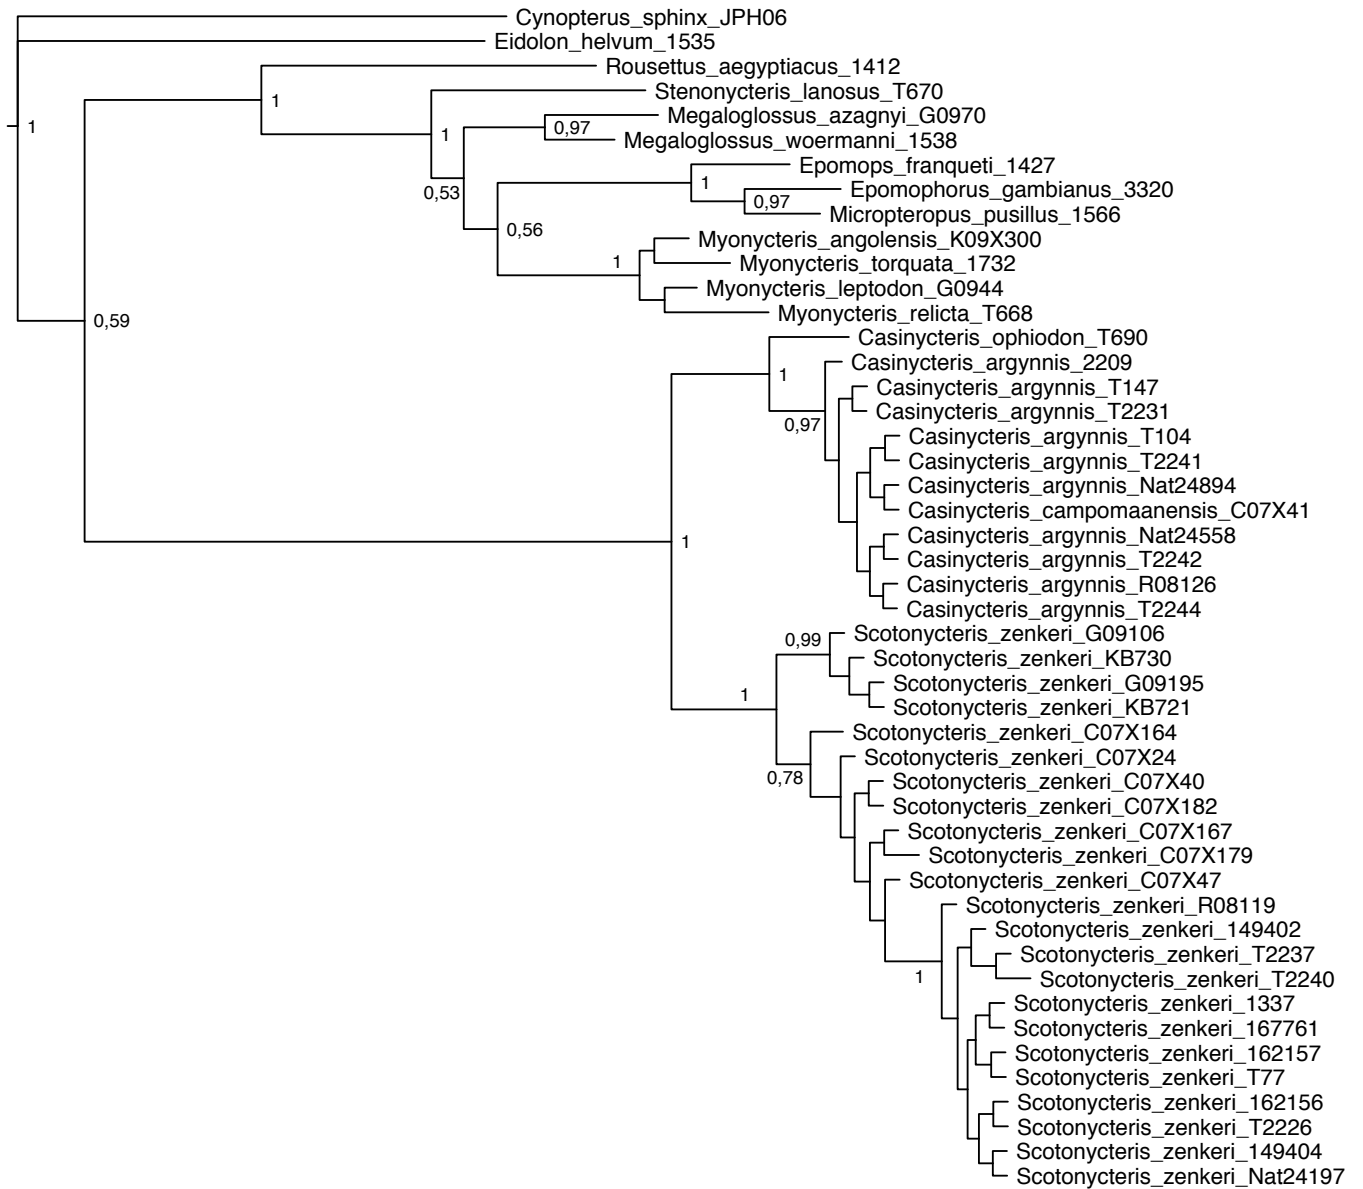



# PABPN1

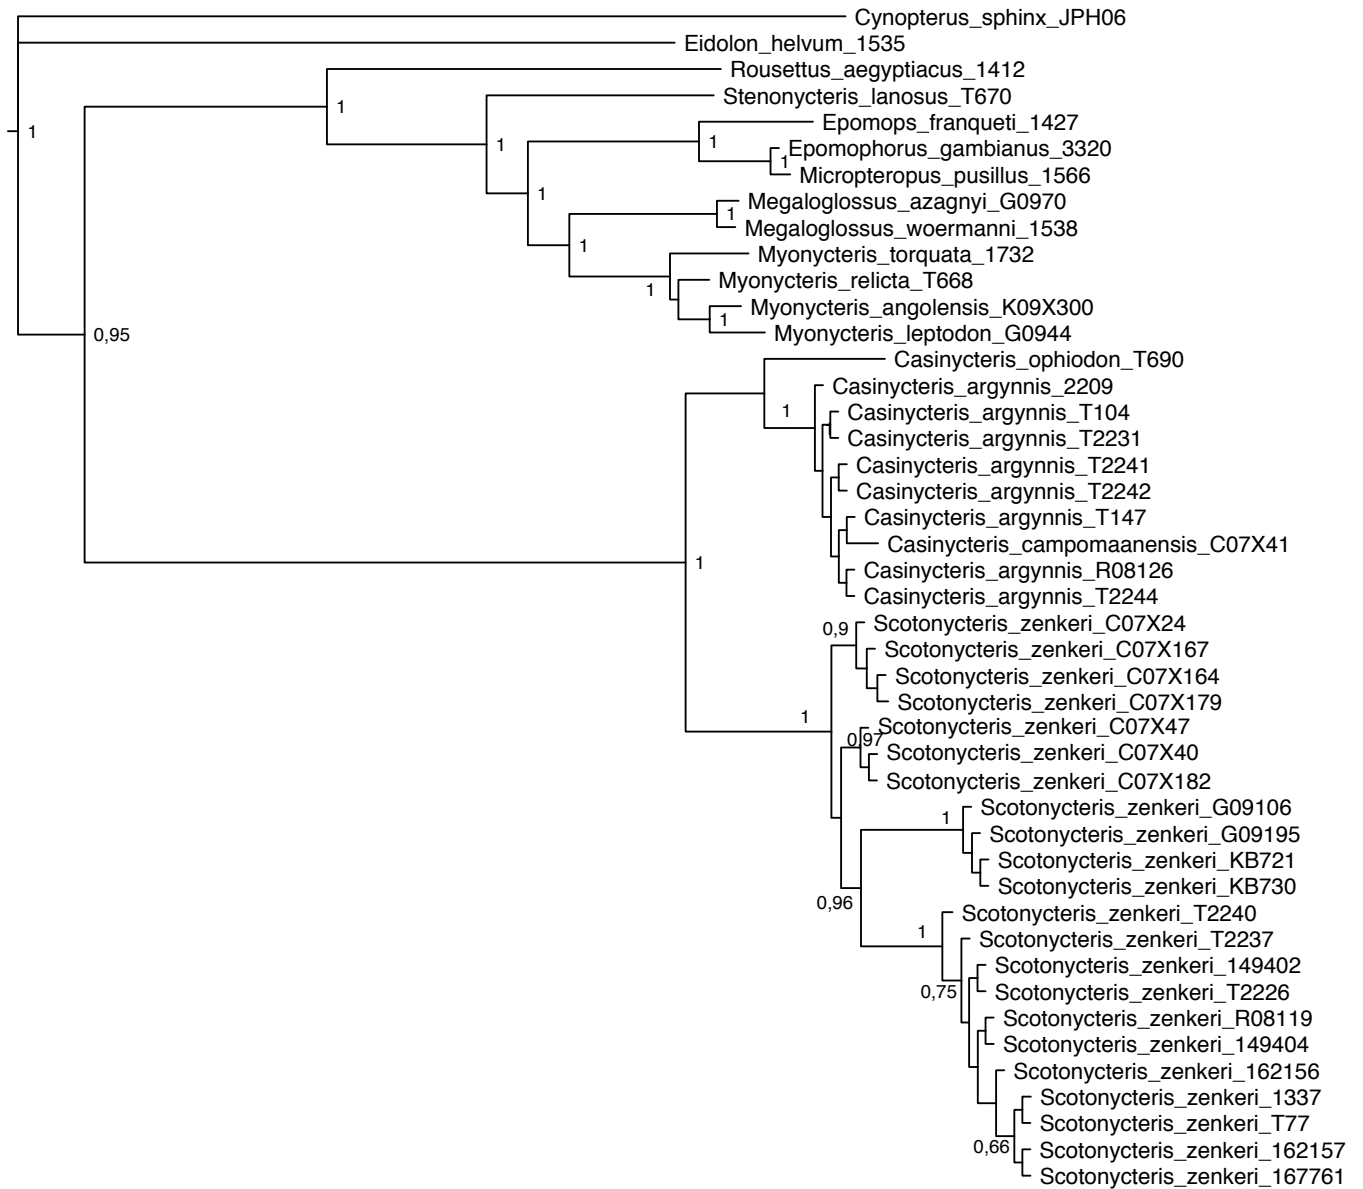

# RIOK3

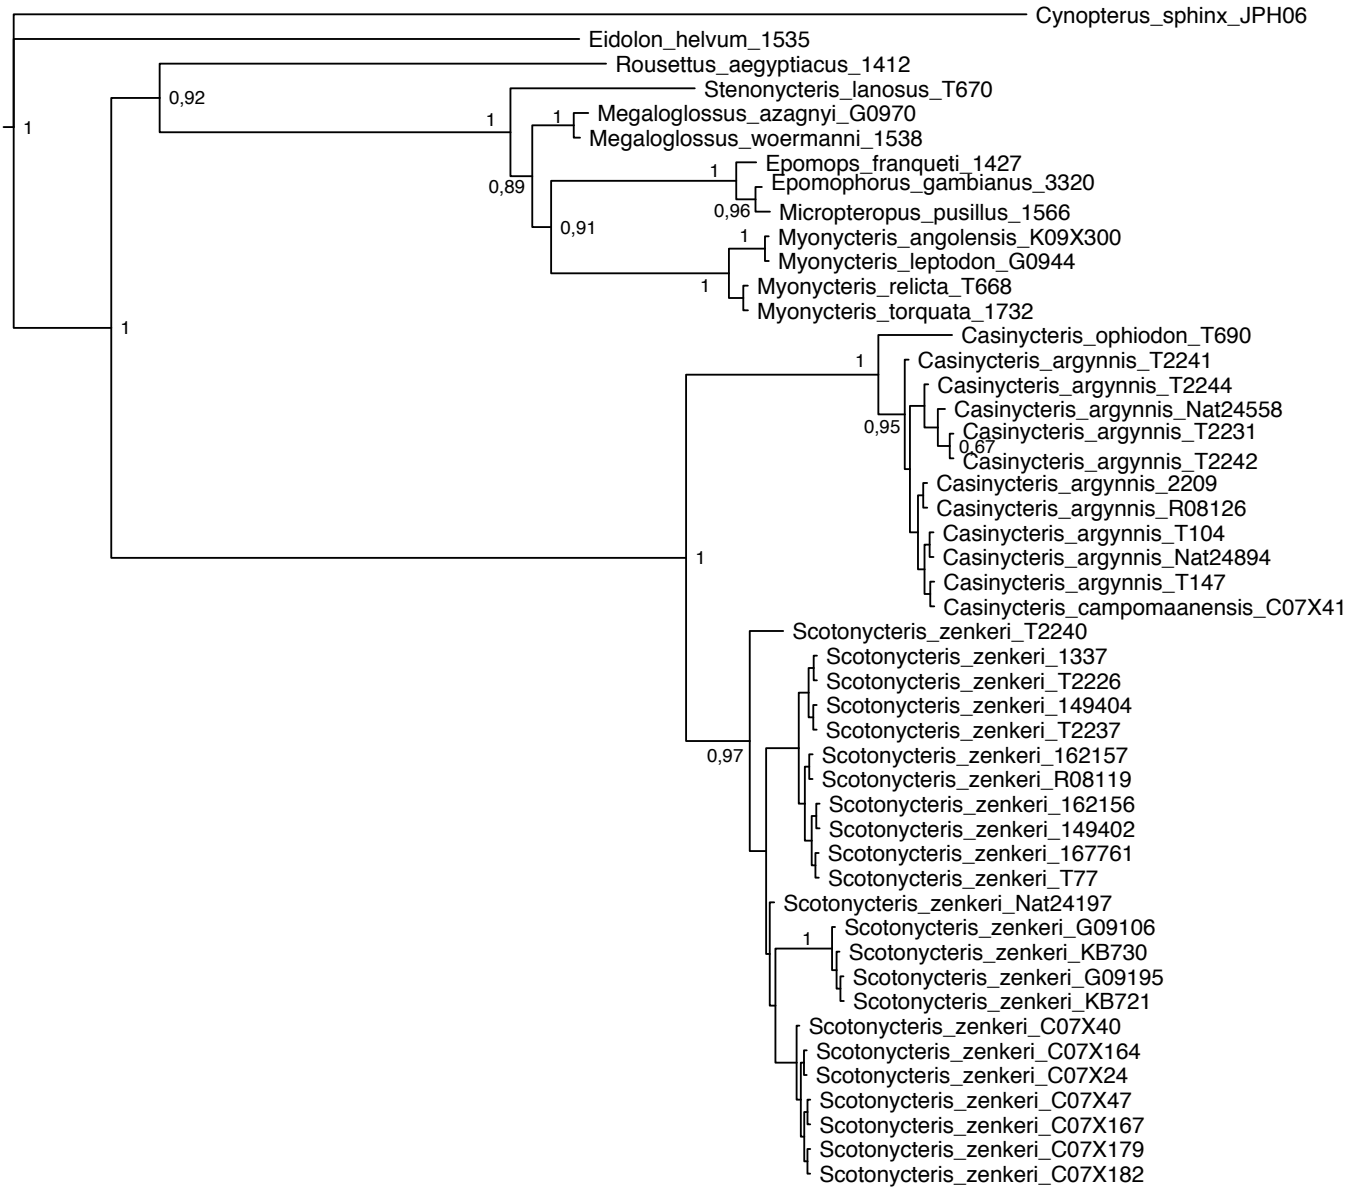

# TUFM

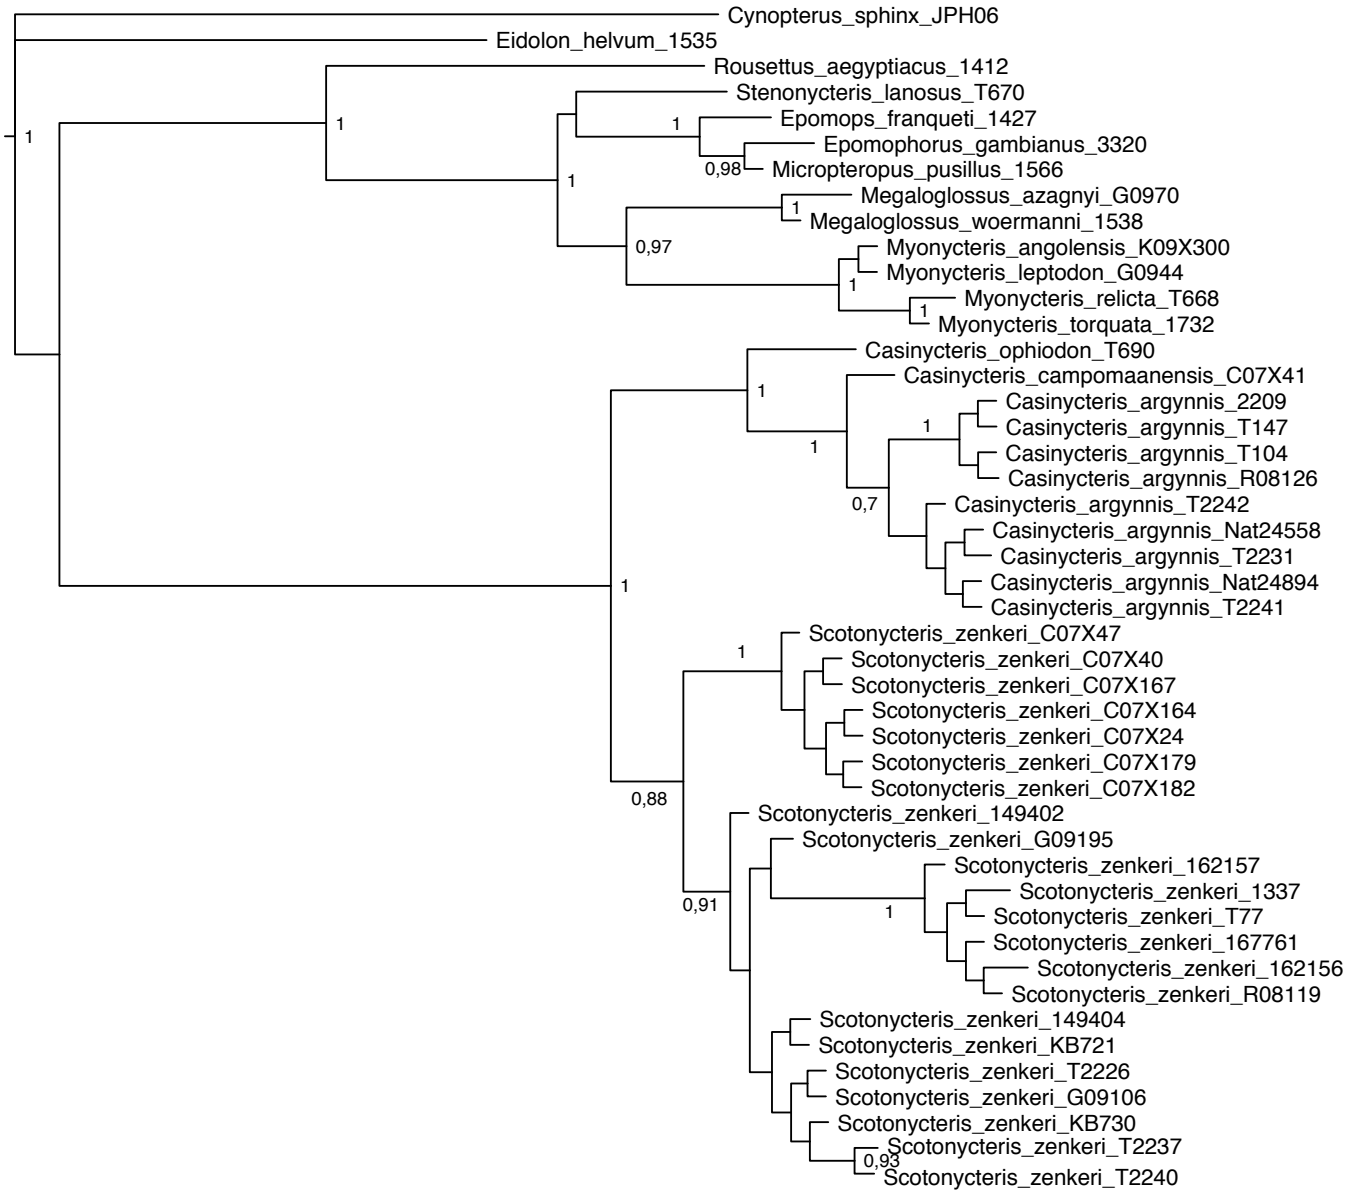

# ZFYVE27

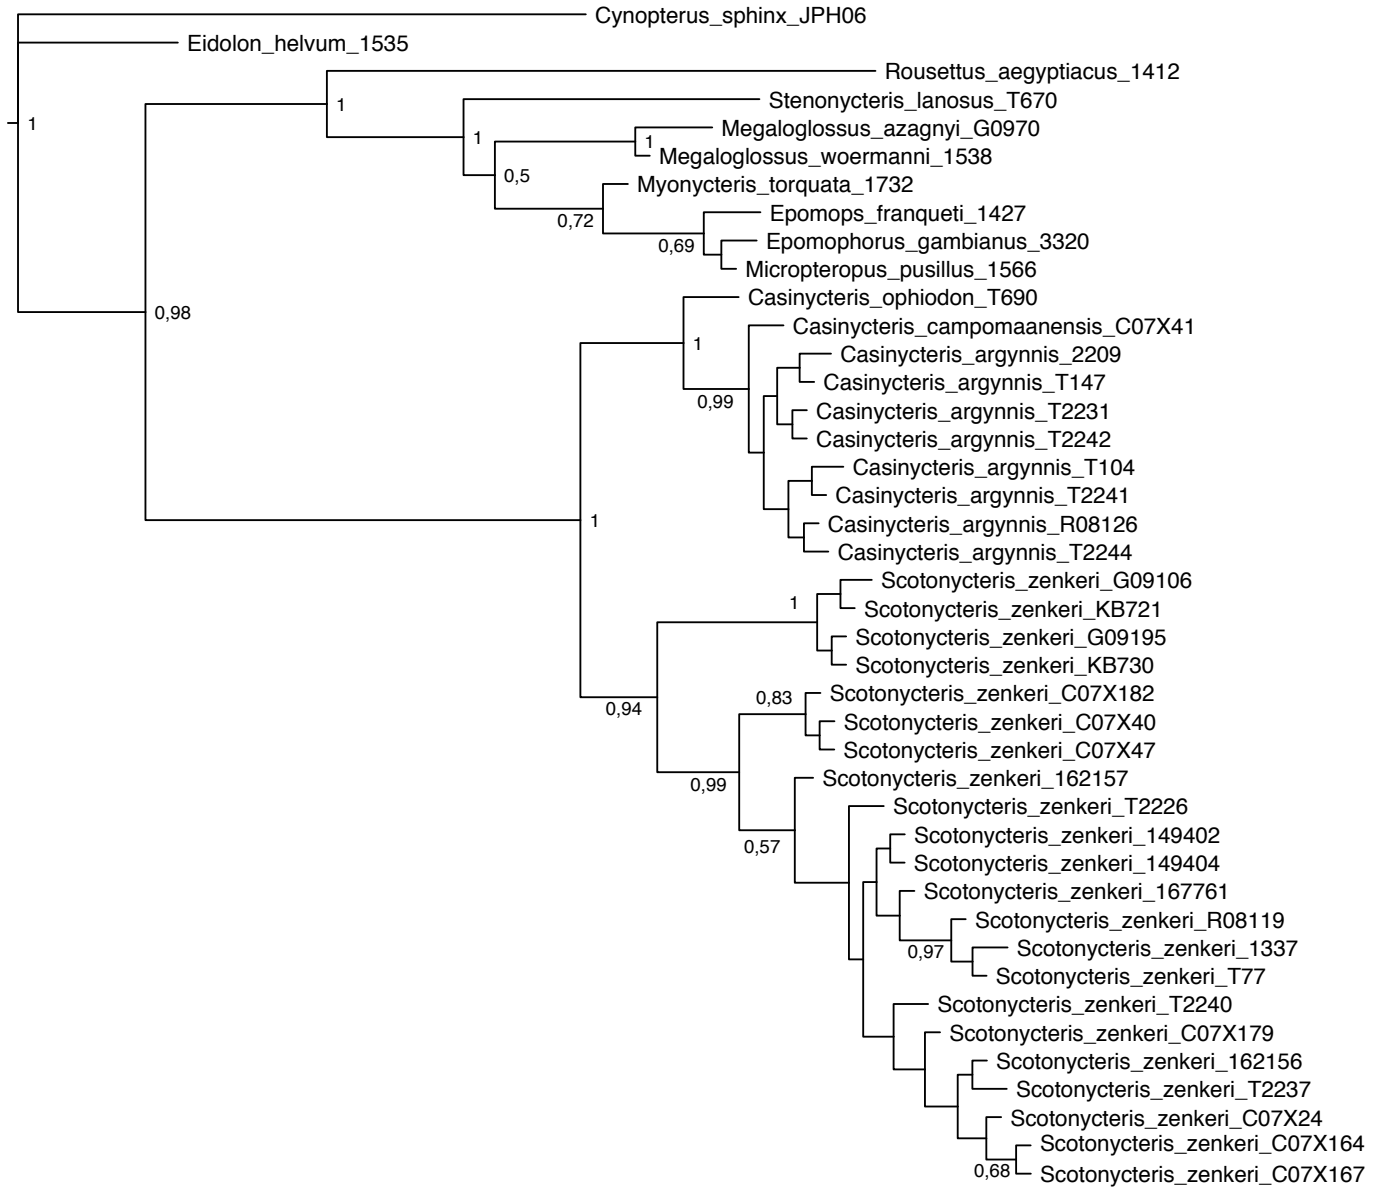

Supplement: mmc5 [file mmc5.pdf]
